# Supplementary material
Source: PubMed Central journal article supplement (PMC4593083)
Supplement: pnas.201510801SI.pdf [file pnas.201510801SI.pdf]

# Supporting Information

Andriessen et al. 10.1073/pnas.1510801112

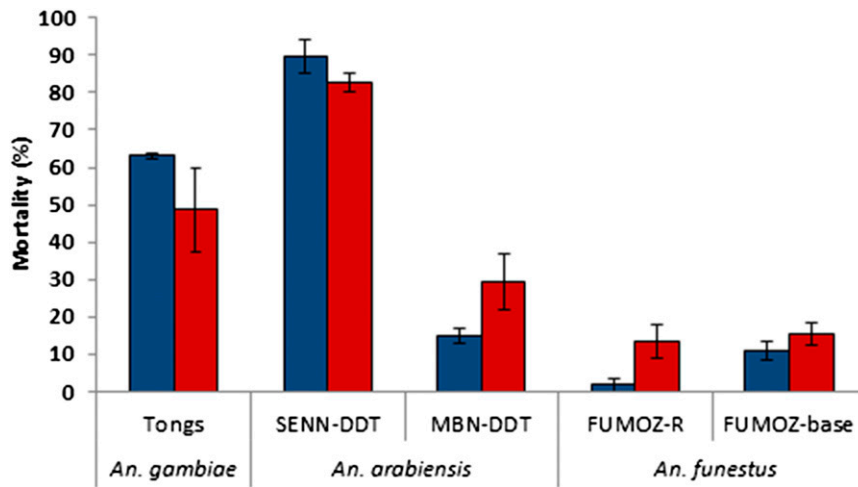

Fig. S1. Average ( $\pm$  SE) mortality and knockdown rates of two groups of 25 female pyrethroid-resistant anopheline strains from the Vector Control Research Unit (VCRU) measured 1 h (blue bars) or 24 h (red bars) after 1-h exposure to 0.05% deltamethrin papers in WHO test tubes.

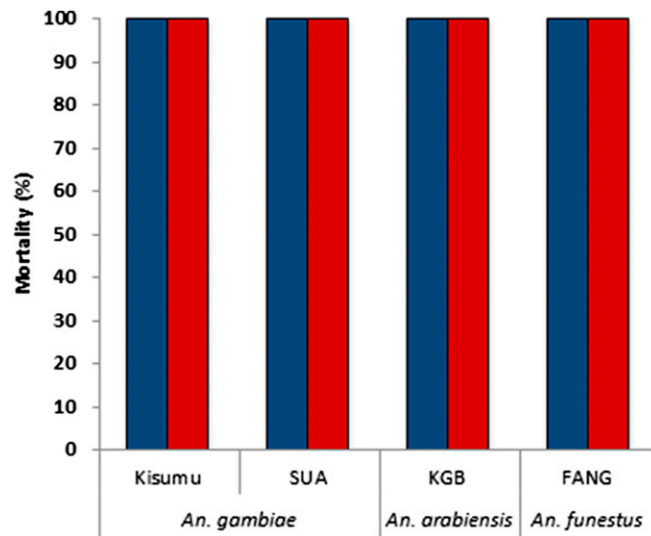

Fig. S2. Mortality rates of susceptible anopheline strains measured 24 h after 3-min exposure to PermaNet 2.0 netting containing 55 mg/m<sup>2</sup> deltamethrin (blue) or electrostatic netting containing 37 mg/m<sup>2</sup> deltamethrin (red).



**Table S3. Origin, rearing, strain, and exposure specifics of the susceptible mosquitoes and the mosquito strains with undefined resistance used in the insecticide bioassays**

| Mosquito species    | Susceptible mosquitoes  |                         |                       |                     |                                | Mosquitoes with undefined resistance |                                |
|---------------------|-------------------------|-------------------------|-----------------------|---------------------|--------------------------------|--------------------------------------|--------------------------------|
|                     | <i>An. gambiae</i> s.s. | <i>An. gambiae</i> s.s. | <i>An. arabiensis</i> | <i>An. funestus</i> | <i>Ae. aegypti</i>             | <i>Cx. quinquefasciatus</i>          | <i>Cx. quinquefasciatus</i>    |
| Mosquito strain     | Kisumu                  | SUA                     | KGB                   | FANG                | I2C-AE                         | I2C-CX                               | Field-collected                |
| Origin              | Kisumu, Kenya           | Suakoko, Liberia        | Kanyembe, Zimbabwe    | Southern Angola     | Aruba                          | USA                                  | Kilombero, Tanzania            |
| Rearing by          | LSTM (LITE)             | VCRU                    | VCRU                  | VCRU                | In2Care                        | In2Care                              | N/A                            |
| Selected resistance | None                    | None                    | None                  | None                | None (field-collected 01/2012) | None                                 | None (field-collected 03/2014) |
| Resistance profile  | Fully susceptible       | Fully susceptible       | Fully susceptible     | Fully susceptible   | Unknown                        | Fully susceptible                    | Fully susceptible              |
| Exposure date       | 13/03/14                | 28/11/14                | 26/11/14              | 30/11/14            | 10/02/14                       | 17/02/14                             | 28/03/14                       |
| Mosquito age        | 3–6 d                   | 2–4 d                   | 2 d                   | 2 d                 | 3–6 d                          | 3–4 d                                | 2 d                            |

LST (LITE), Liverpool School of Tropical Medicine (Liverpool Insect Testing Establishment).

**Table S4. Origin, rearing, strain, resistance status, and exposure specifics of mosquito strains with well-defined resistance profiles used in the insecticide bioassays**

| Mosquito species    | <i>An. gambiae</i> s.s. | <i>An. gambiae</i> s.s.           | <i>An. arabiensis</i>                | <i>An. arabiensis</i>                | <i>An. funestus</i>                         | <i>An. funestus</i>          |
|---------------------|-------------------------|-----------------------------------|--------------------------------------|--------------------------------------|---------------------------------------------|------------------------------|
| Mosquito strain     | Tiassale                | Tongs                             | SENN-DDT                             | MBN-DDT                              | Fumoz-R                                     | Fumoz-base                   |
| Origin              | Tiassale, Burkina Faso  | Tongon, Ivory Coast               | Sennar, Sudan                        | KwaZulu Natal, South Africa          | Mozambique                                  | Mozambique                   |
| Rearing by          | LSTM (LITE)             | VCRU                              | VCRU                                 | VCRU                                 | VCRU                                        | VCRU                         |
| Selected resistance | Pyrethroid resistance   | Multiple, no selection since 2010 | DDT resistance (selected since 1995) | DDT resistance (selected until 2013) | Permethrin resistance (selected until 2001) | Naturally multiple resistant |
| Resistance profile  | Kdr and P450s           | Not known                         | Kdr, GSTs, P450s, esterases          | Kdr, P450s, GSTs, esterases          | P450s, GST                                  | P450, GST                    |
| Exposure date       | 13/03/2014              | 26/11/14                          | 25/11/14                             | 01/12/2014                           | 25/11/14                                    | 27/11/14                     |
| Mosquito age        | 2–4 d                   | 3 d                               | 3 d                                  | 2 or 3 d                             | 2–4 d                                       | 2–4 d                        |

LST (LITE), Liverpool School of Tropical Medicine (Liverpool Insect Testing Establishment).
